# Supplementary material
Source: PubMed Central journal article supplement (PMC6193539)
Supplement: NIHMS78946-supplement-Supplementary_Data_1.pdf [file NIHMS78946-supplement-Supplementary_Data_1.pdf]

## Supplementary data

**Supplementary Figure S1. Most ribosome-associated miRNAs show medium occupancy and may share common biological functions.** A-B) Polysomal profile of REN cells in the absence (A) and in the presence (B) of EDTA. Ribosomal subunits are evidenced. Fractions pooling is indicated. C) Heatmap of miRNAs polysome occupancy on EDTA treated and untreated REN cells: the bulk of miRNAs exhibit a medium occupancy. D) Correlation analysis between miRNAs occupancy and miRNAs expression levels reveals that the two factors are not associated ( $R^2 = 0.35182$ ). E) *In silico* pathways analysis has been performed using MirSystem (<http://mirsystem.cgm.ntu.edu.tw/>) on line tool on the most significant polysomes associated miRNAs.

**Supplementary Figure S2. miR-24-3p is expressed in lung and breast cancer cells.** Real time PCR evidences that miR-24-3p is expressed also in the indicated lung and breast cancer cell lines, at different levels. MPM indicates a pool of Mesothelioma cell lines. Values represent the mean  $\pm$  SD.

**Supplementary Figure S3. miR-24-3p knockdown mildly affects cell proliferation and does not influence the apoptotic rate of MPM cell lines.** A) qRT-PCR indicates that transduction of miR-Zip-24 reduces miR-24-3p expression in REN, MM98 and MSTO-211H cells. miR-empty is used as control. B) CTB viability assay on REN, MM98 and MSTO-211H indicates that a partial depletion of miR-24-3p reduces MPM cell lines proliferation, at the indicated time points. C) FACS analysis shows that the apoptotic rate is similar in all conditions evaluated in REN, MM98 and MSTO-211H cells. MPM cells treated with Staurosporin are used as positive control for apoptosis. D) Cell cycle analysis of REN, MM98 and MSTO-211H cells with normal or depleted miR-24-3p expression. All values represent the mean  $\pm$  SD of three independent experiments. p-values, obtained by two-tailed Student's t-test, are indicated (\* $p \leq 0.05$ ; \*\* $p \leq 0.01$ ).

**Supplementary Figure S4. miR-24-3p fosters cells migration capability.** A) Representative images of wound-healing assay on MSTO-211H cells show that miR-24-3p knockdown reduces cells migration, compared to miR-empty, used as control. B) qRT-

PCR evidences transduction efficiency of miR-24-3p in MeT-5A cells. C-D) Representative images of wound-healing assay on breast MCF7 cells after partial depletion (C) and overexpression (D) of miR-24-3p confirm that miR-24-3p has a promigratory role. Results are representative of three independent experiments. p-value, obtained by Student t-test, is indicated ( $***p \leq 0.001$ ). Scale bar corresponds to 10 $\mu$ m.

**Supplementary Figure S5. RNA-seq analysis on miR-24-3p knockdown REN and MM98 cells.** A) Upregulated genes are categorized in protein coding genes, pseudogenes, lncRNAs and antisense RNAs, showing similar percentage in both REN and MM98 cell lines. B) Schematic of miR-24-3p putative direct targets derived from bioinformatic/NGS crossing analysis (details in the text). C) PRECOG analysis on selected miR-24-3p regulated genes, assessed by mean meta-z-scores, shows that they are associated with favorable survival in most considered cancer types. D) Real Time PCR analysis of indicated migration involved mRNA targets confirms upregulation when miR-24-3p is inhibited, both in REN, MM98 and MSTO-211H cells. E) qRT-PCR on MeT-5A cells illustrates that indicated targets are downregulated in miR-24-3p overexpression condition. F) Actinomycin D treatment of MPM miR-Empty and MPM miR-Zip24 cells indicates that knockdown of miR-24-3p results in an expected increase of CGN mRNA stability.

**Supplementary Figure S6. CXADR and BCAM mRNA distribution in REN polysomes.** A) CXADR mRNA distribution in REN miR-empty and miR-Zip-24 cells shows that CXADR mRNA is more translated in miR-24-3p knockdown conditions. B) Similar results were obtained for BCAM mRNA. Values represent the mean  $\pm$  SD. All experiments are performed as biological replicates. p-values, obtained by two-tailed Student's t-test, are indicated (\* $p \leq 0.05$ ; \*\* $p \leq 0.01$ ; \*\*\* $p \leq 0.001$ ).

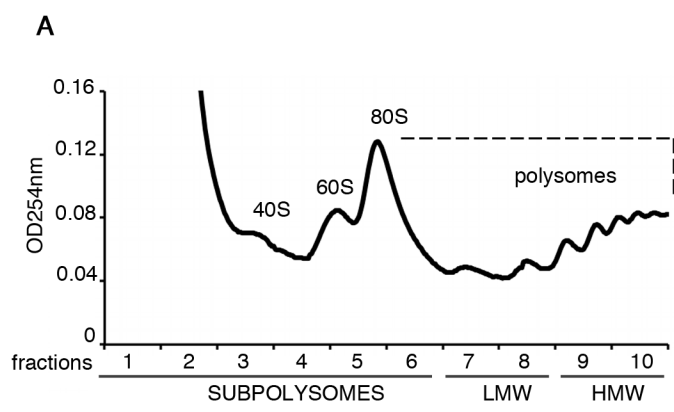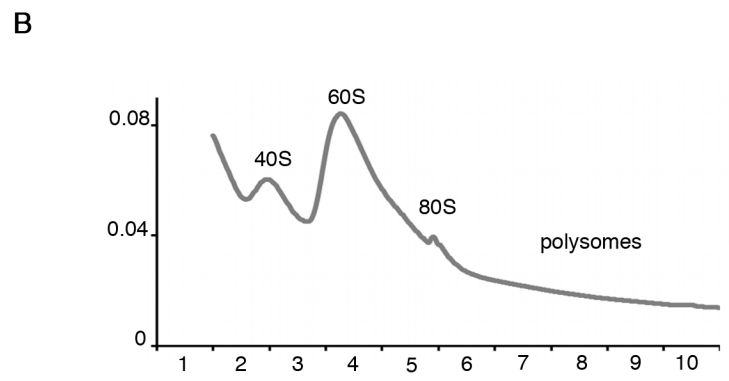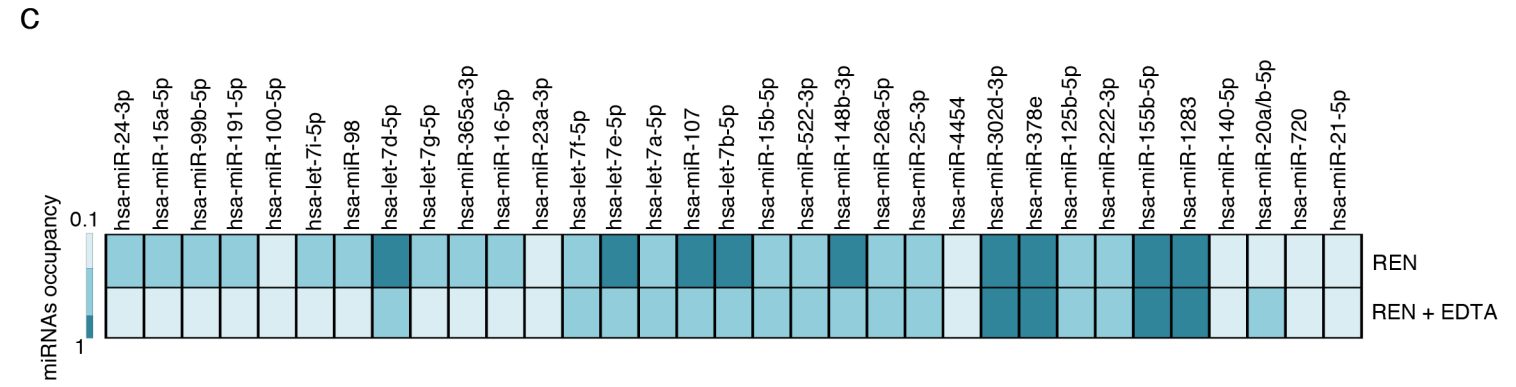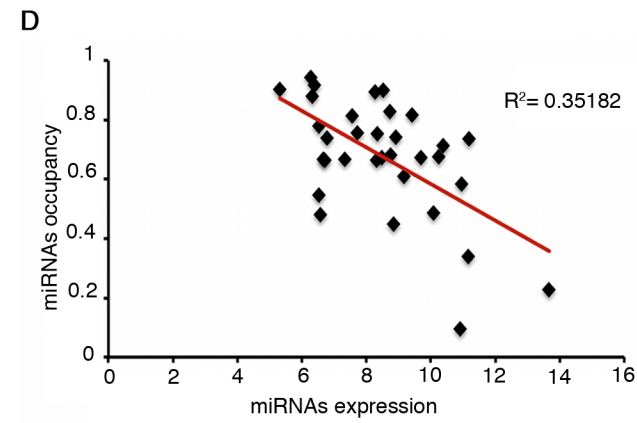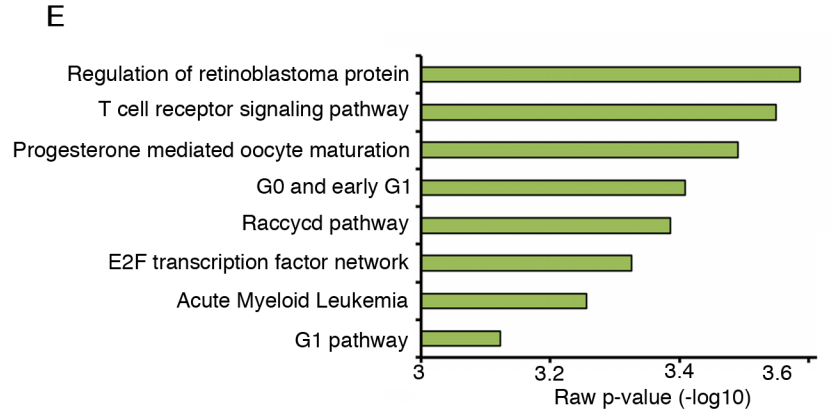

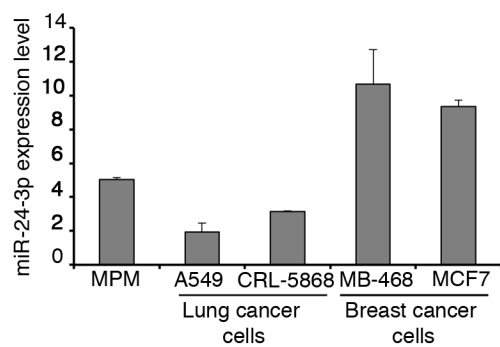

A

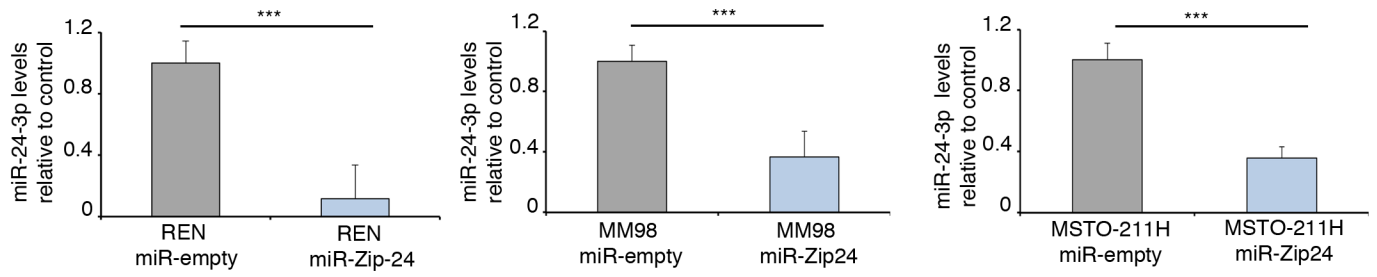

B

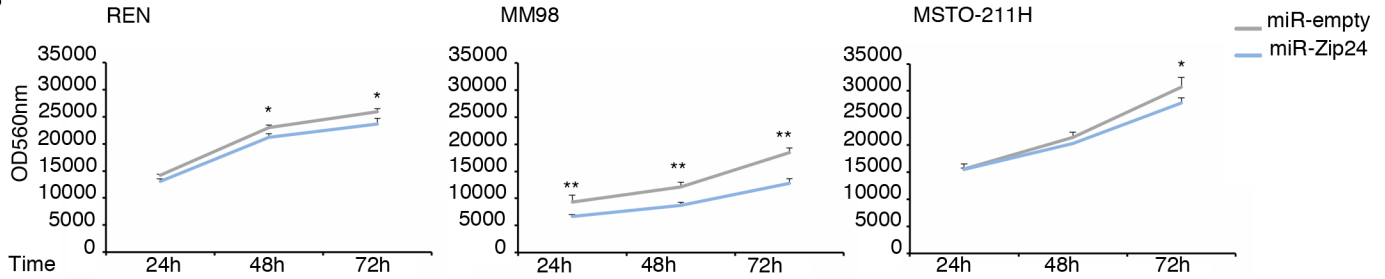

C

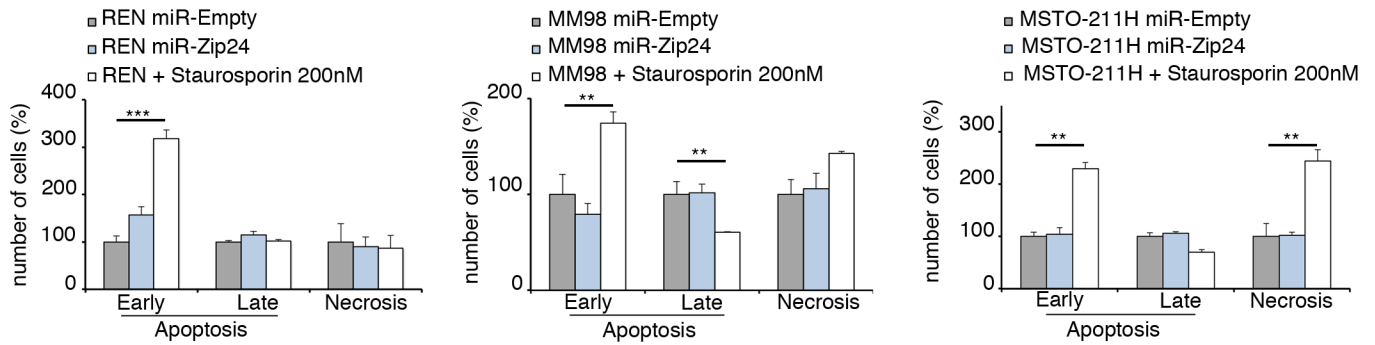

D

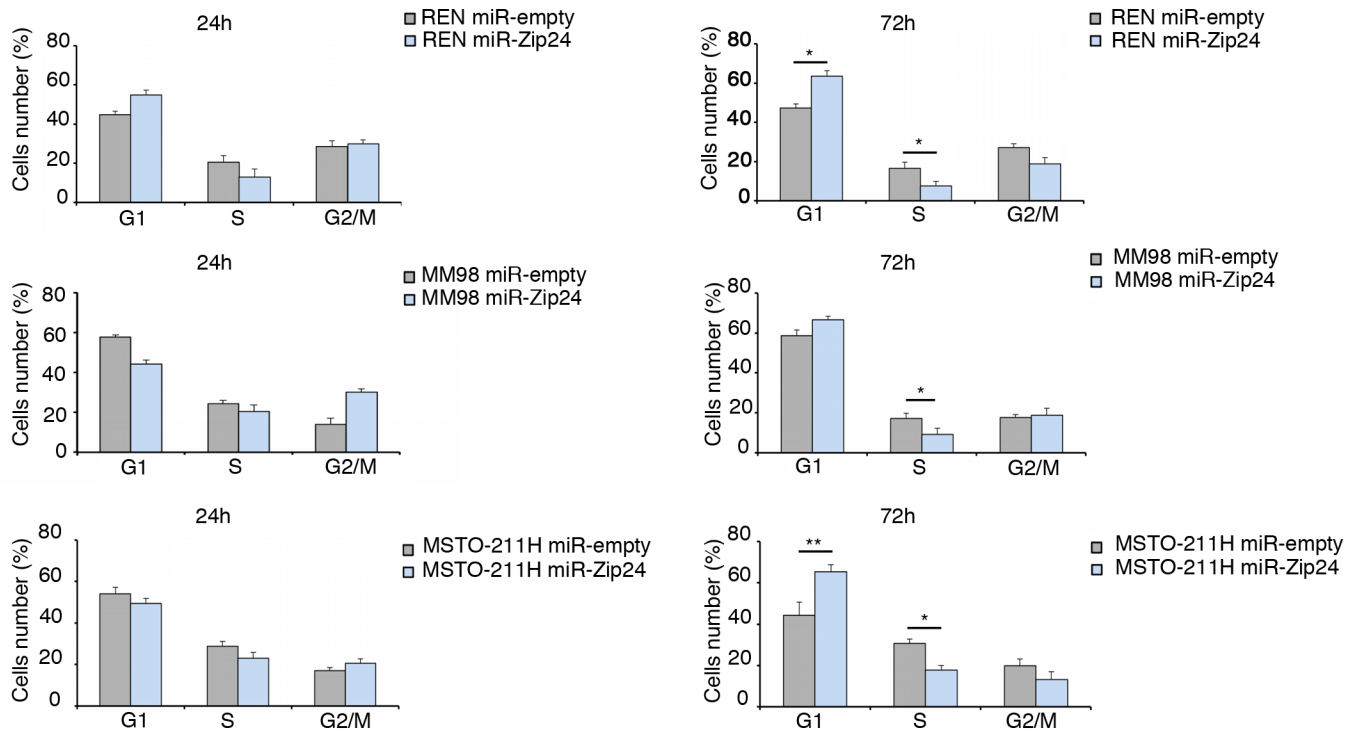

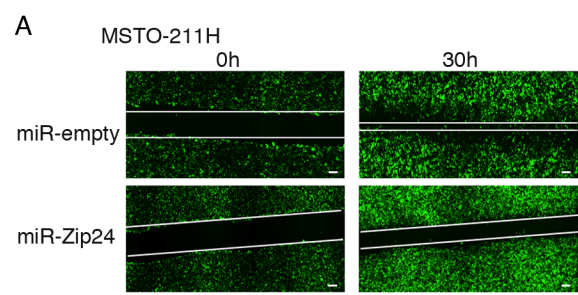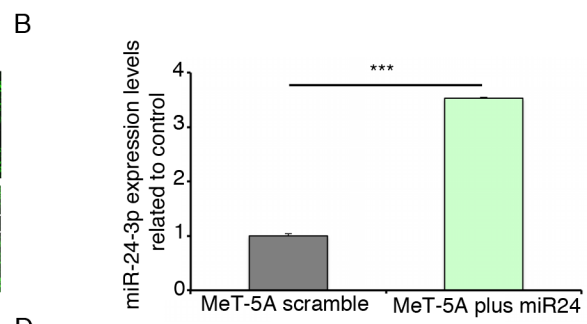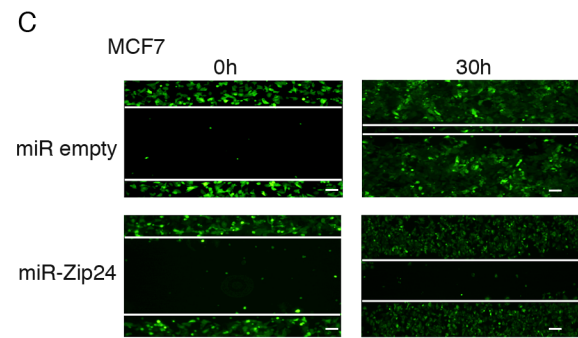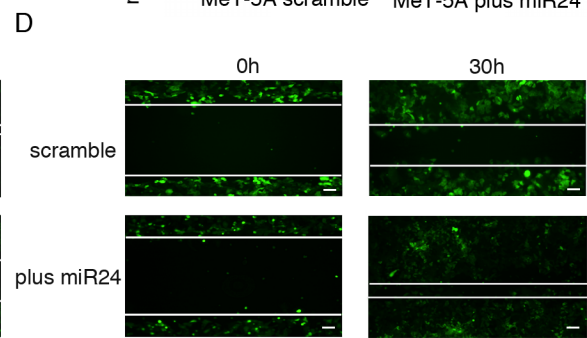

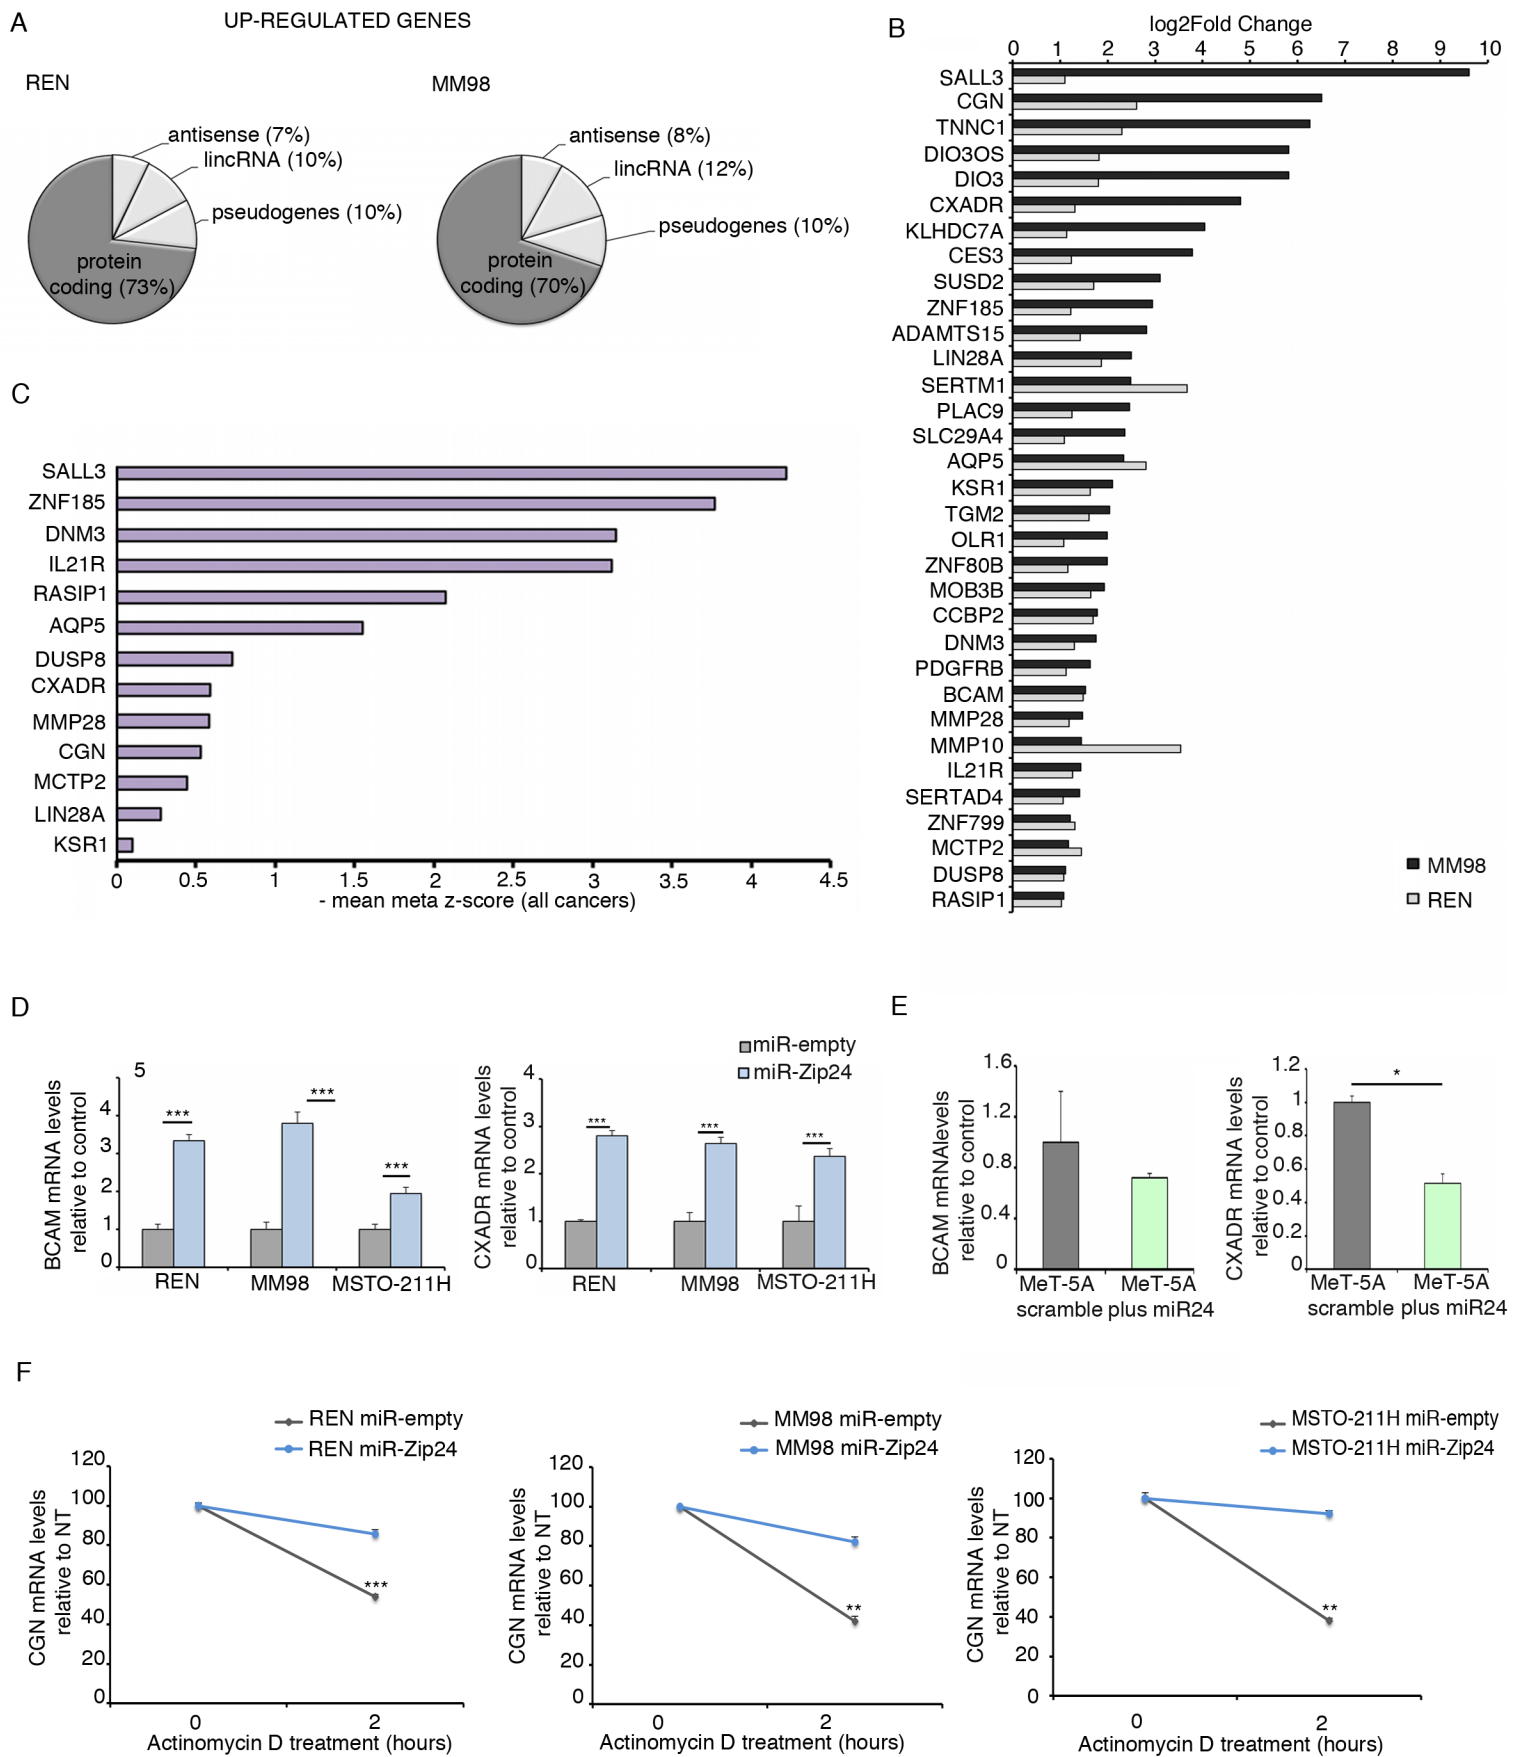

A

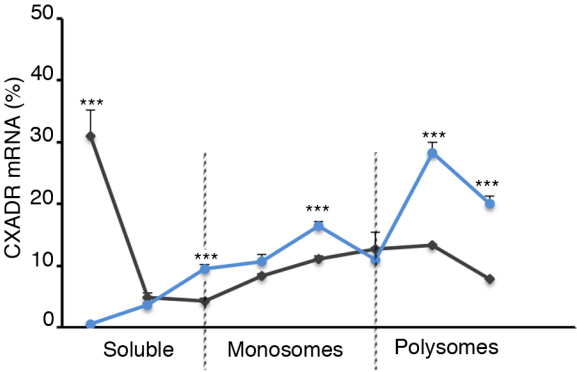

B

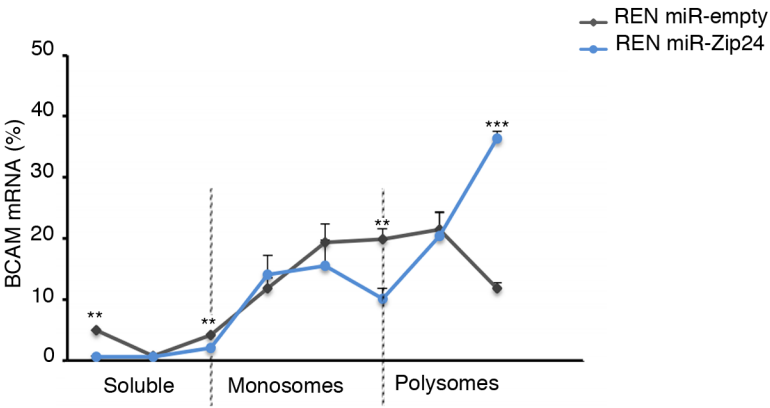

**Supplementary Table S1. Autopsies of NOD-SCID mice 30 days after I.P. REN injection.** The number of autopsies is indicated for each group. Weights value represent the mean  $\pm$  SD.

| Group                | Weight (grams)   |                 |                 | Metastasis                           | Ascite  | Hemorrhage |
|----------------------|------------------|-----------------|-----------------|--------------------------------------|---------|------------|
|                      | Body             | Diaphragm       | Tumor mass      |                                      |         |            |
| miR-empty mice (n=6) | 30,45 $\pm$ 1,68 | 0,30 $\pm$ 0,13 | 0,54 $\pm$ 0,16 | High abundance, enlarged limphonodes | Massive | Massive    |
| miR-Zip24 mice (n=6) | 27,75 $\pm$ 2,42 | 0,16 $\pm$ 0,09 | 0,20 $\pm$ 0,12 | Low abundance                        | Mild    | ND         |
